# Supplementary material for: Functional relevance of novel p300-mediated lysine 314 and 315 acetylation of RelA/p65
Source: PubMed Central journal article supplement — Nucleic Acids Res. 2008 Feb 7;36(5):1665–80. doi: 10.1093/nar/gkn003 (PMC2275151; doi:10.1093/nar/gkn003), 2008-02-07
Supplement: nar_gkn003_1.pdf [file nar_gkn003_1.pdf]

Buerki *et al.*, Supplementary Figure 1

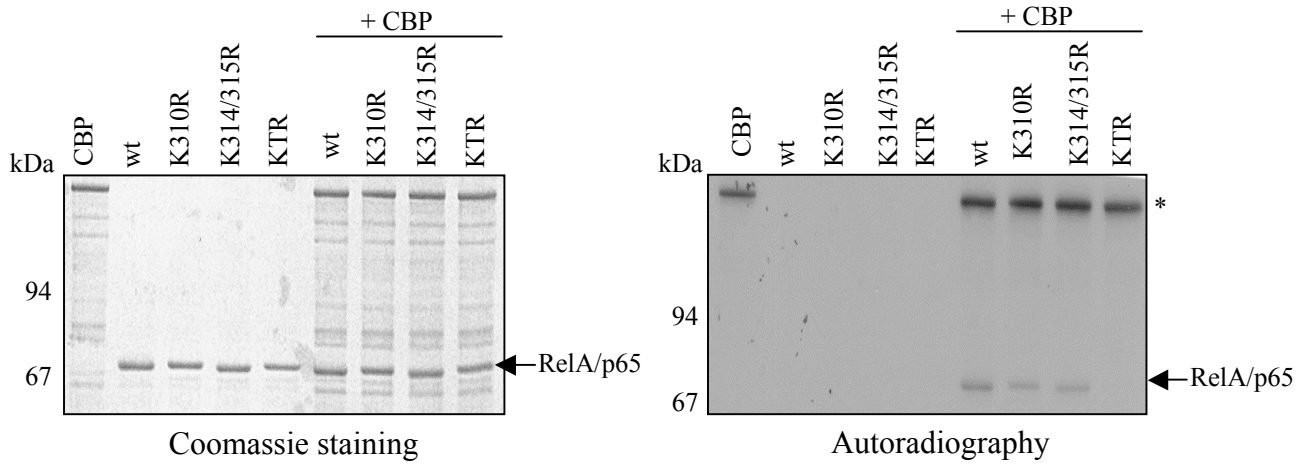

Supplementary Figure 1. *In vitro* acetylation of RelA/p65K/R mutants by CBP. Proteins were analyzed as in Fig. 2C. The autoacetylation signals of CBP are indicated with an asterisk (\*).
