# Supplementary material for: Functional relevance of novel p300-mediated lysine 314 and 315 acetylation of RelA/p65
Source: PubMed Central journal article supplement — Nucleic Acids Res. 2008 Feb 7;36(5):1665–80. doi: 10.1093/nar/gkn003 (PMC2275151; doi:10.1093/nar/gkn003), 2008-02-07
Supplement: nar_gkn003_2.pdf [file nar_gkn003_2.pdf]

Table S1.

Up regulated genes, K310R(45' TNF $\alpha$ ) versus wild type (45' TNF $\alpha$ ), fold change>1.5, p $\leq$ 0.01

| Gene symbol   | Genbank   | Fc    | P value   | Gene name                                                                                                                                                                                  |
|---------------|-----------|-------|-----------|--------------------------------------------------------------------------------------------------------------------------------------------------------------------------------------------|
| Gt12          | Y13832    | 3.647 | 0.006186  | mRNA for GT12 protein                                                                                                                                                                      |
| Dlk1          | NM_010052 | 2.757 | 0.006641  | Delta-like 1 homolog (Drosophila)                                                                                                                                                          |
| Dlk1          | NM_010052 | 2.72  | 0.005557  | Delta-like 1 homolog (Drosophila)                                                                                                                                                          |
| Erff1         | BC057646  | 2.697 | 0.0002829 | Mus musculus ERBB receptor feedback inhibitor 1, mRNA                                                                                                                                      |
| Msrb2         | NM_029619 | 2.645 | 0.0001878 | Methionine sulfoxide reductase B2                                                                                                                                                          |
| 2900084M21    | AK041604  | 2.325 | 0.008482  | Mus musculus 3 days neonate thymus cDNA, RIKEN full-length enriched library, clone:A630024E20 product:weakly similar to HYPOTHETICAL 39.6 KDA PROTEIN [Homo sapiens], full insert sequence |
| Tro           | NM_207679 | 2.236 | 0.006008  | Trophinin, transcript variant 2                                                                                                                                                            |
| 5730469M10Rik | NM_027464 | 2.192 | 0.001747  | Mus musculus RIKEN cDNA 5730469M10 gene (5730469M10Rik), mRNA                                                                                                                              |
| Galnt12       | NM_172693 | 2.154 | 0.001765  | UDP-N-acetyl-alpha-D-galactosamine:polypeptide N-acetylgalactosaminyltransferase 12                                                                                                        |
| AK013991      | AK013991  | 2.122 | 0.001992  | Mus musculus 13 days embryo head cDNA, RIKEN full-length enriched library, clone:3110004L20 product:unknown EST, full insert sequence.                                                     |
| Prss12        | NM_008939 | 2.099 | 0.008835  | Protease, serine, 12 neurotrypsin (motopsin)                                                                                                                                               |
| NAP105475-1   | BB794657  | 2.098 | 0.001401  | BB794657 RIKEN full-length enriched, RCB-0545 OHTA cDNA Mus musculus cDNA clone G431001F07 3', mRNA sequence                                                                               |
| Klf2          | NM_008452 | 2.033 | 0.009625  | Kruppel-like factor 2 (lung)                                                                                                                                                               |
| Afap1l2       | NM_146102 | 2.015 | 0.001942  | Actin filament associated protein 1-like 2                                                                                                                                                 |
| D330027G24    | AK052318  | 1.993 | 0.003918  | Mus musculus 13 days embryo heart cDNA, RIKEN full-length enriched library, clone:D330027G24 product:unclassifiable, full insert sequence.                                                 |
| Sox13         | NM_011439 | 1.979 | 0.008644  | SRY-box containing gene 13                                                                                                                                                                 |
| Slc22a4       | NM_019687 | 1.937 | 0.007295  | Solute carrier family 22 (organic cation transporter), member 4                                                                                                                            |
| Gcnt1         | NM_173442 | 1.928 | 0.002026  | Glucosaminyl (N-acetyl) transferase 1, core 2                                                                                                                                              |
| Sept5         | NM_213614 | 1.924 | 0.004824  | Septin 5                                                                                                                                                                                   |
| Arl6ip1       | NM_019419 | 1.896 | 0.00114   | ADP-ribosylation factor-like 6 interacting protein 1                                                                                                                                       |
| 4930506M07    | NM_175172 | 1.886 | 0.003976  | Mus musculus RIKEN cDNA 4930506M07 gene (4930506M07Rik), mRNA                                                                                                                              |
| Stxbp2        | NM_011503 | 1.879 | 0.003016  | Syntaxin binding protein 2                                                                                                                                                                 |
| Timp3         | NM_011595 | 1.865 | 0.002573  | Tissue inhibitor of metalloproteinase 3                                                                                                                                                    |
| Prkg2         | NM_008926 | 1.838 | 0.002898  | Protein kinase, cGMP-dependent, type II                                                                                                                                                    |
| Arf2          | NM_007477 | 1.836 | 0.001513  | Mus musculus ADP-ribosylation factor 2                                                                                                                                                     |
| Cpt1a         | NM_013495 | 1.787 | 0.009517  | Carnitine palmitoyltransferase 1a, liver                                                                                                                                                   |
| 4933426M11Rik | NM_178682 | 1.775 | 0.003504  | Mus musculus RIKEN cDNA 4933426M11 gene (4933426M11Rik), mRNA                                                                                                                              |
| Sirpa         | BC062197  | 1.758 | 0.004272  | Signal-regulatory protein alpha                                                                                                                                                            |
| Rdh10         | NM_133832 | 1.753 | 0.004895  | Retinol dehydrogenase 10 (all-trans)                                                                                                                                                       |
| 4832416J02    | AK029299  | 1.746 | 0.002467  | Mus musculus 0 day neonate head cDNA, RIKEN full-length enriched library, clone:4832416J02 product:hypothetical protein, full insert sequence.                                             |
| Casp3         | NM_009810 | 1.744 | 0.004639  | caspase 3, apoptosis related cysteine protease                                                                                                                                             |
| Klf8          | NM_173780 | 1.741 | 0.001656  | Kruppel-like factor 8                                                                                                                                                                      |
| Abcb1b        | NM_011075 | 1.732 | 0.002105  | ATP-binding cassette, sub-family B (MDR/TAP), member 1B                                                                                                                                    |
| Bckdhb        | NM_199195 | 1.728 | 0.006631  | Branched chain ketoacid dehydrogenase E1, beta polypeptide                                                                                                                                 |
| ORF19         | NM_026833 | 1.696 | 0.007873  | Open reading frame 19, transcript variant 1                                                                                                                                                |
| Wwtr1         | NM_133784 | 1.691 | 0.007864  | WW domain containing transcription regulator 1                                                                                                                                             |
| 2310046K01Rik | NM_027172 | 1.68  | 0.005302  | Mus musculus RIKEN cDNA 2310046K01 gene (2310046K01Rik), mRNA                                                                                                                              |
| Casc4         | NM_177054 | 1.679 | 0.0005404 | Cancer susceptibility candidate 4, transcript variant 1                                                                                                                                    |
| Epb4.1l2      | NM_013511 | 1.676 | 0.008634  | Erythrocyte protein band 4.1-like 2                                                                                                                                                        |
| Mllt3         | NM_027326 | 1.672 | 0.005561  | Myeloid/lymphoid or mixed lineage-leukemia translocation to 3 homolog (Drosophila)                                                                                                         |
| Rdh10         | NM_133832 | 1.666 | 0.003641  | Retinol dehydrogenase 10 (all-trans)                                                                                                                                                       |
| Pcolce2       | NM_029620 | 1.646 | 0.003052  | Procollagen C-endopeptidase enhancer 2                                                                                                                                                     |
| Tspan12       | NM_173007 | 1.643 | 0.004675  | Tetraspanin 12                                                                                                                                                                             |
| AK014046      | AK014046  | 1.637 | 0.004499  | Mus musculus 13 days embryo head cDNA, RIKEN full-length enriched library, clone:3110013H01 product:hypothetical protein, full insert sequence                                             |

| Gene symbol        | Genbank   | Fc    | P value   | Gene name                                                                                                                                       |
|--------------------|-----------|-------|-----------|-------------------------------------------------------------------------------------------------------------------------------------------------|
| Lrrc5              | NM_178701 | 1.629 | 0.004573  | Leucine rich repeat containing 5                                                                                                                |
| Cd34               | NM_133654 | 1.626 | 0.00506   | CD34 antigen                                                                                                                                    |
| Abhd1              | BC013505  | 1.58  | 0.006029  | Abhydrolase domain containing 1                                                                                                                 |
| Cgref1             | BC023116  | 1.578 | 0.004083  | Cell growth regulator with EF hand domain 1                                                                                                     |
| NAP035112-1        |           | 1.575 | 0.004504  | Q80U21 (Q80U21) MKIAA0377 protein (Fragment), partial (7%) [TC1521712]                                                                          |
| Txnip              | NM_023719 | 1.572 | 0.001293  | Thioredoxin interacting protein, transcript variant 2                                                                                           |
| AK043559           | NM_146115 | 1.572 | 0.009035  | Mus musculus RIKEN cDNA A830007P12 gene (A830007P12Rik)                                                                                         |
| Eif5a              | NM_181582 | 1.568 | 0.006411  | Eukaryotic translation initiation factor 5A                                                                                                     |
| BC028819           | NM_027434 | 1.564 | 0.009722  | Mus musculus RIKEN cDNA 2610304G08 gene (2610304G08Rik), mRNA                                                                                   |
| AK014229           | AK014229  | 1.562 | 0.005841  | Mus musculus 13 days embryo head cDNA, RIKEN full-length enriched library, clone:3110057M17 product:hypothetical protein, full insert sequence. |
| Gnb4               | NM_013531 | 1.558 | 0.003828  | Guanine nucleotide binding protein, beta 4                                                                                                      |
| Tcf4               | NM_013685 | 1.557 | 0.004954  | Transcription factor 4                                                                                                                          |
| NAP092822-001      | XM_133399 | 1.556 | 0.001576  | record removed                                                                                                                                  |
| NAP102091-1        |           | 1.551 | 0.004549  | n/a                                                                                                                                             |
| Ramp2              | NM_019444 | 1.547 | 0.002055  | Receptor (calcitonin) activity modifying protein 2                                                                                              |
| Edem2              | NM_145537 | 1.546 | 0.005162  | ER degradation enhancer, mannosidase alpha-like 2                                                                                               |
| Tspan13            | NM_025359 | 1.541 | 0.007244  | Mus musculus tetraspanin 13                                                                                                                     |
| Ormd13             | NM_025661 | 1.536 | 0.001808  | ORM1-like 3 ( <i>S. cerevisiae</i> )                                                                                                            |
| Ccdc85b            | NM_198616 | 1.534 | 0.002771  | Coiled-coil domain containing 85B                                                                                                               |
| Pgam2              | NM_018870 | 1.529 | 0.005666  | Phosphoglycerate mutase 2                                                                                                                       |
| H2afy2             | NM_026230 | 1.524 | 0.006053  | H2A histone family, member Y2                                                                                                                   |
| Stk4               | NM_021420 | 1.524 | 0.009552  | Serine/threonine kinase 4                                                                                                                       |
| BC023045           | NM_134087 | 1.523 | 0.005559  | Mus musculus expressed sequence AA409316 (AA409316), mRNA                                                                                       |
| Nat9               | NM_025400 | 1.523 | 0.004023  | NAT9 (Nat9)                                                                                                                                     |
| ENSMUST00000054243 |           | 1.519 | 0.003157  |                                                                                                                                                 |
| Nt5c3l             | NM_026561 | 1.518 | 0.005396  | 5'-nucleotidase, cytosolic III-like                                                                                                             |
| Tmed2              | NM_019770 | 1.517 | 0.003126  | Mus musculus transmembrane emp24 domain trafficking protein 2                                                                                   |
| Homer 1            | NM_011982 | 1.516 | 0.0001625 | Homer homolog 1 ( <i>Drosophila</i> ), transcript variant S                                                                                     |
| Kazald1            | NM_178929 | 1.512 | 0.0001053 | Kazal-type serine protease inhibitor domain 1                                                                                                   |
| Ssbp4              | NM_133772 | 1.512 | 0.005302  | Single stranded DNA binding protein 4                                                                                                           |
| Ralgps2            | NM_023884 | 1.509 | 0.007823  | Ral GEF with PH domain and SH3 binding motif 2                                                                                                  |
| Rnf170             | BC031383  | 1.509 | 0.009045  | Ring finger protein 170                                                                                                                         |
| Clnd1              | NM_171826 | 1.505 | 0.002794  | Claudin domain containing 1                                                                                                                     |
| Cdc7               | NM_009863 | 1.503 | 0.001982  | Cell division cycle 7 ( <i>S. cerevisiae</i> )                                                                                                  |
| Itga3              | NM_013565 | 1.5   | 0.008686  | Integrin alpha 3                                                                                                                                |

Down regulated genes, K310R (45' TNF $\alpha$ ) versus wild type (45' TNF $\alpha$ ), fold change<0.667, p $\le$ 0.01

| Gene symbol   | Genbank   | Fc     | P value  | Gene name                                                                                                                                                                         |
|---------------|-----------|--------|----------|-----------------------------------------------------------------------------------------------------------------------------------------------------------------------------------|
| AI592138      | AI592138  | 0.1237 | 0.001344 | mr25f11.y1 Soares mouse 3NbMS Mus musculus cDNA clone IMAGE:598509 5' similar to gb:D16333 Mouse mRNA for coproporphyrinogen oxidase, complete cds (MOUSE)                        |
| NAP000805-003 | XM_620550 | 0.1485 | 0.006373 | PREDICTED: Mus musculus hypothetical protein A630026L20 (A630026L20), mRNA                                                                                                        |
| Gvin1         | NM_029000 | 0.1588 | 0.006435 | GTPase, very large interferon inducible 1                                                                                                                                         |
| Cnn1          | NM_009922 | 0.1598 | 0.006889 | Calponin 1                                                                                                                                                                        |
| Gvin1         | NM_029000 | 0.1712 | 0.00577  | GTPase, very large interferon inducible 1                                                                                                                                         |
| Usp18         | NM_011909 | 0.1869 | 0.000465 | Ubiquitin specific protease 18                                                                                                                                                    |
| Ifi44         | NM_133871 | 0.2379 | 0.008188 | Interferon-induced protein 44                                                                                                                                                     |
| C730018G06    | AK050122  | 0.2701 | 0.00017  | Mus musculus adult male liver tumor cDNA, RIKEN full-length enriched library, clone:C730018G06 product:unknown EST, full insert sequence.                                         |
| B830045N13Rik | NM_153539 | 0.2841 | 0.001028 | Mus musculus RIKEN cDNA B830045N13 gene (B830045N13Rik), mRNA                                                                                                                     |
| Rtp4          | NM_023386 | 0.287  | 0.001117 | Receptor transporter protein 4                                                                                                                                                    |
| Ccl20         | NM_016960 | 0.2924 | 0.008038 | Chemokine (C-C motif) ligand 20                                                                                                                                                   |
| Oas1f         | NM_145153 | 0.3364 | 0.000296 | 2'-5' oligoadenylate synthetase 1F                                                                                                                                                |
| Gbp3          | NM_018734 | 0.3381 | 0.00657  | Guanylate nucleotide binding protein 3                                                                                                                                            |
| Trim25        | NM_009546 | 0.3536 | 0.003339 | Tripartite motif protein 25                                                                                                                                                       |
| Plac8         | NM_139198 | 0.358  | 0.000262 | placenta-specific 8                                                                                                                                                               |
| AK035818      | AK028848  | 0.4074 | 0.00917  | Mus musculus 10 days neonate skin cDNA, RIKEN full-length enriched library, clone:4732462B05 product:hypothetical Histidine-rich region containing protein, full insert sequence. |
| Oas1a         | NM_145211 | 0.4183 | 0.003299 | 2'-5' oligoadenylate synthetase 1A                                                                                                                                                |
| NAP040287-1   |           | 0.4227 | 0.000904 |                                                                                                                                                                                   |
| Gbp2          | NM_010260 | 0.4422 | 0.005688 | Guanylate nucleotide binding protein 2                                                                                                                                            |
| PARP14        | BC021340  | 0.4494 | 0.006259 | Poly (ADP-ribose) polymerase family, member 14                                                                                                                                    |
| Bst2          | NM_198095 | 0.4501 | 0.006823 | Bone marrow stromal cell antigen 2                                                                                                                                                |
| Thy1          | NM_009382 | 0.4537 | 0.000369 | Thymus cell antigen 1, theta                                                                                                                                                      |
| Elavl2        | NM_207685 | 0.4597 | 0.004283 | Mus musculus ELAV (embryonic lethal, abnormal vision, Drosophila)-like 2 (Hu antigen B),transcript variant 1                                                                      |
| Ccl7          | NM_013654 | 0.4714 | 0.004106 | Chemokine (C-C motif) ligand 7                                                                                                                                                    |
| BC030392      | BC030392  | 0.4768 | 0.008308 | Mus musculus cDNA clone MGC:40659 IMAGE:4923983, complete cds.                                                                                                                    |
| H2-DMb1       | NM_010387 | 0.4903 | 0.000164 | Histocompatibility 2, class II, locus Mb1                                                                                                                                         |
| BE985144      |           | 0.4924 | 0.001203 |                                                                                                                                                                                   |
| Colec12       | NM_130449 | 0.4941 | 0.005928 | Collectin sub-family member 12                                                                                                                                                    |
| Sulf1         | NM_172294 | 0.4958 | 0.009678 | Sulfatase 1                                                                                                                                                                       |
| AK075797      | AK075797  | 0.5047 | 0.009933 | Mus musculus 10 day old male pancreas cDNA, RIKEN full-length enriched library, clone:1810049E24 product:DNA segment, Chr 12, ERATO Doi 647, expressed, full insert sequence.     |
| Ifit3         | NM_010501 | 0.5116 | 0.00232  | Interferon-induced protein with tetratricopeptide repeats 3                                                                                                                       |
| Ifi1          | NM_008326 | 0.513  | 0.002881 | Interferon inducible protein 1                                                                                                                                                    |
| Ifi1          | NM_008326 | 0.5237 | 0.000994 | Interferon inducible protein 1                                                                                                                                                    |
| NAP104453-1   |           | 0.5239 | 0.00013  | Q7TP79 (Q7TP79) Aa2-245, partial (5%) [TC1434027]                                                                                                                                 |
| Hoxa5         | NM_010453 | 0.5254 | 0.001711 | Homeo box A5                                                                                                                                                                      |
| Ifih1         | NM_027835 | 0.5334 | 0.009112 | Interferon induced with helicase C domain 1                                                                                                                                       |
| Asb4          | NM_023048 | 0.541  | 0.00951  | Ankyrin repeat and SOCS box-containing protein 4                                                                                                                                  |
| AK003718      | AK003718  | 0.5457 | 0.000221 | Mus musculus 18-day embryo whole body cDNA, RIKEN full-length enriched library, clone:1110014O20 product:unknown EST, full insert sequence.                                       |
| AK049305      | AK049305  | 0.5543 | 0.003268 | Mus musculus ES cells cDNA, RIKEN full-length enriched library, clone:C330021E21 product:hypothetical DEAD/DEAH box helicase containing protein, full insert sequence.            |
| 6330400M01    | AK122576  | 0.5589 | 0.009789 | Mus musculus mRNA for mKIAA3001 protein. [AK122576]                                                                                                                               |
| Col18a1       | NM_009929 | 0.5592 | 0.000505 | Procollagen, type XVIII, alpha 1                                                                                                                                                  |
| Trim12        | AK009769  | 0.5638 | 0.00781  | Mus musculus adult male tongue cDNA, RIKEN full-length enriched library, clone:2310043C01 product:tripartite motif protein 12, full insert sequence.                              |
| Epha7         | NM_010141 | 0.5666 | 0.003436 | Eph receptor A7                                                                                                                                                                   |
| Cxcl16        | AK028875  | 0.5671 | 0.005471 | Mus musculus 10 days neonate skin cDNA, RIKEN full-length enriched library, clone:4732465K06 product:CXC chemokine ligand 16, full insert sequence.                               |

| Gene symbol   | Genbank      | Fc     | P value  | Gene name                                                                                                                                                                      |
|---------------|--------------|--------|----------|--------------------------------------------------------------------------------------------------------------------------------------------------------------------------------|
| C130005N09    | AK081324     | 0.5677 | 0.007802 | Mus musculus 16 days embryo head cDNA, RIKEN full-length enriched library, clone:C130005N09 product:hypothetical protein, full insert sequence.                                |
| Hoxa4         | NM_008265    | 0.5701 | 0.007359 | Homeo box A4                                                                                                                                                                   |
| Mgat3         | NM_010795    | 0.5751 | 0.000722 | Mannoside acetylglucosaminyltransferase 3                                                                                                                                      |
| Dmxl2         | BC023075     | 0.5775 | 0.004321 | Dmx-like 2                                                                                                                                                                     |
| Dcamk1l       | NM_019978    | 0.5777 | 0.005223 | Double cortin and calcium/calmodulin-dependent protein kinase-like 1                                                                                                           |
| NAP020702-001 | AK220526     | 0.5812 | 0.004138 | Mus musculus mRNA for mKIAA4178 protein                                                                                                                                        |
| Nr2f1         | NM_010151    | 0.5854 | 0.009391 | Nuclear receptor subfamily 2, group F, member 1                                                                                                                                |
| AK036111      | AK036109     | 0.5866 | 0.008066 | Mus musculus 16 days neonate cerebellum cDNA, RIKEN full-length enriched library, clone:9630036I19 product:hypothetical protein, full insert sequence                          |
| Tpm2          | AK077713     | 0.5886 | 0.002474 | Mus musculus 8 days embryo whole body cDNA, RIKEN full-length enriched library, clone:5730544G20 product:tropomyosin 2, beta, full insert sequence.                            |
| Tnfrsf6       | AK086933     | 0.5928 | 0.007082 | Mus musculus 0 day neonate lung cDNA, RIKEN full-length enriched library, clone:E030012O08 product:tumor necrosis factor receptor superfamily, member 6, full insert sequence. |
| 5330408M09    | AK008077     | 0.5976 | 0.004452 | Mus musculus adult male small intestine cDNA, RIKEN full-length enriched library, clone:2010003O02 product:unknown EST, full insert sequence.                                  |
| Oas1c         | NM_033541    | 0.5991 | 0.002389 | 2'-5' oligoadenylate synthetase 1C                                                                                                                                             |
| Chac2         | NM_026527    | 0.5994 | 0.00571  | ChaC, cation transport regulator homolog 2 (E. coli)                                                                                                                           |
| C130051K14    | AK081614     | 0.6048 | 0.009404 | Mus musculus 16 days embryo head cDNA, RIKEN full-length enriched library, clone:C130051K14 product:unknown EST, full insert sequence.                                         |
| AK015293      | NM_029045    | 0.6069 | 9.60E-05 | Mus musculus RIKEN cDNA 4930432K21 gene (4930432K21Rik), mRNA                                                                                                                  |
| Nfkbiz        | NM_030612    | 0.6097 | 0.009174 | Nuclear factor of kappa light polypeptide gene enhancer in B-cells inhibitor, zeta                                                                                             |
| 4632422O06    | AK122518     | 0.6123 | 0.004732 | Mus musculus mRNA for mKIAA1500 protein                                                                                                                                        |
| Antxr1        | NM_054041    | 0.6138 | 0.001923 | Anthrax toxin receptor 1                                                                                                                                                       |
| Igfl1         | NM_010512    | 0.6172 | 0.007021 | Insulin-like growth factor 1                                                                                                                                                   |
| Itgp          | NM_018738    | 0.618  | 0.009669 | Interferon gamma induced GTPase                                                                                                                                                |
| Rgmb          | NM_178615    | 0.6195 | 0.009934 | RGM domain family, member B                                                                                                                                                    |
| Bzrap1        | NM_172449    | 0.6199 | 0.001636 | Benzodiazapine receptor associated protein 1                                                                                                                                   |
| Nudcd2        | NM_026023    | 0.62   | 0.009005 | NudC domain containing 2                                                                                                                                                       |
| Cacna1c       | NM_009781    | 0.6207 | 0.002012 | Calcium channel, voltage-dependent, L type, alpha 1C subunit                                                                                                                   |
| Penk1         | NM_001002927 | 0.6218 | 0.006754 | Preproenkephalin 1                                                                                                                                                             |
| Peg3          | NM_001010988 | 0.6304 | 0.008035 | Paternally expressed 3,transcript variant 2                                                                                                                                    |
| D330012D16    | BC030633     | 0.6317 | 0.003972 | Mus musculus, clone IMAGE:1282582, mRNA                                                                                                                                        |
| 2310001H17    | AK009064     | 0.6332 | 0.003062 | Mus musculus adult male tongue cDNA, RIKEN full-length enriched library, clone:2310001H17 product:unknown EST, full insert sequence.                                           |
| Pcdhb17       | NM_053142    | 0.6405 | 0.003546 | Protocadherin beta 17                                                                                                                                                          |
| Rhoe          | NM_028810    | 0.6432 | 0.008051 | Ras homolog gene family, member E                                                                                                                                              |
| Hoxa1         | NM_010449    | 0.6449 | 0.009473 | Homeo box A1                                                                                                                                                                   |
| AK017901      | AK017901     | 0.6463 | 0.00481  | Mus musculus adult male thymus cDNA, RIKEN full-length enriched library, clone:5830406C15 product:unknown EST, full insert sequence.                                           |
| Uox           | NM_009474    | 0.6568 | 0.003612 | Urate oxidase                                                                                                                                                                  |
| Tbc1d24       | NM_173186    | 0.6591 | 0.007282 | TBC1 domain family, member 24                                                                                                                                                  |
| Card15        | NM_145857    | 0.6599 | 0.009643 | Caspase recruitment domain family, member 15                                                                                                                                   |
| 5830464M07    | AK030937     | 0.6657 | 0.005091 | Mus musculus adult male thymus cDNA, RIKEN full-length enriched library, clone:5830464M07 product:unknown EST, full insert sequence.                                           |
| AK077009      | BC067195     | 0.6663 | 0.002397 | Mus musculus cDNA clone IMAGE:5716597, containing frame-shift errors                                                                                                           |
| NAP041503-1   | XM_131700    | 0.6664 | 0.006918 | PREDICTED: Mus musculus cDNA sequence BC039093 (BC039093), mRNA                                                                                                                |
