# Supplementary material for: Functional relevance of novel p300-mediated lysine 314 and 315 acetylation of RelA/p65
Source: PubMed Central journal article supplement — Nucleic Acids Res. 2008 Feb 7;36(5):1665–80. doi: 10.1093/nar/gkn003 (PMC2275151; doi:10.1093/nar/gkn003), 2008-02-07
Supplement: nar_gkn003_3.pdf [file nar_gkn003_3.pdf]

Table S2.

Up regulated genes, K314/315R (45'TNF $\alpha$ ) versus wild type (45'TNF $\alpha$ ),  $fc > 1.5$ ,  $p \leq 0.01$ 

| Gene symbol | Genbank   | Fc    | P value   | Gene name                                                                                                                                                                                   |
|-------------|-----------|-------|-----------|---------------------------------------------------------------------------------------------------------------------------------------------------------------------------------------------|
| Lmol1       | NM_057173 | 10.33 | 0.00233   | LIM domain only 1                                                                                                                                                                           |
| Col4a6      | BC057646  | 8.913 | 0.008209  | procollagen, type IV, alpha 6                                                                                                                                                               |
| Ppy         | NM_008918 | 5.091 | 0.005147  | Pancreatic polypeptide                                                                                                                                                                      |
| Smpdl3b     | NM_133888 | 4.904 | 0.005875  | Sphingomyelin phosphodiesterase, acid-like 3B                                                                                                                                               |
| NAP105502-1 | AK081879  | 4.57  | 0.0007991 | Mus musculus 16 days embryo head cDNA, RIKEN full-length enriched library, clone:C130084F15 product:unknown EST, full insert sequence.                                                      |
| AK021193    | XM_128979 | 4.457 | 0.003661  | PREDICTED: Mus musculus RIKEN cDNA C330008K14 gene (C330008K14Rik), mRNA                                                                                                                    |
| Peg12       | NM_013788 | 4.414 | 0.001011  | Paternally expressed 12                                                                                                                                                                     |
| Cdkn1c      | NM_009876 | 4.29  | 0.005527  | Cyclin-dependent kinase inhibitor 1C (P57)                                                                                                                                                  |
| Y13832      | Y13832    | 4.227 | 0.003713  | mRNA for GT12 protein.                                                                                                                                                                      |
| Afp         | NM_007423 | 3.812 | 0.0001381 | Alpha fetoprotein                                                                                                                                                                           |
| lpd         | NM_053178 | 3.491 | 0.008395  | Lipidosin                                                                                                                                                                                   |
| Frat1       | NM_008043 | 3.34  | 0.001169  | Frequently rearranged in advanced T-cell lymphomas                                                                                                                                          |
| A330060M13  | NM_177173 | 3.304 | 0.005584  | Mus musculus RIKEN cDNA A830018L16 gene (A830018L16Rik), mRNA                                                                                                                               |
| Cbr3        | NM_173047 | 3.269 | 0.007212  | Carbonyl reductase 3                                                                                                                                                                        |
| 2900084M21  | AK041604  | 3.205 | 0.007542  | Mus musculus 3 days neonate thymus cDNA, RIKEN full-length enriched library, clone:A630024E20 product:weakly similar to HYPOTHETICAL 39.6 KDA PROTEIN [Homo sapiens], full insert sequence. |
| Frat1       | NM_008043 | 3.176 | 0.00187   | Frequently rearranged in advanced T-cell lymphomas                                                                                                                                          |
| Gtl2        | NM_144513 | 3.082 | 0.006416  | GTL2, imprinted maternally expressed untranslated mRNA                                                                                                                                      |
| Plf2        | NM_011118 | 2.975 | 0.0001415 | Proliferin 2                                                                                                                                                                                |
| Dlk1        | NM_010052 | 2.937 | 0.008054  | Delta-like 1 homolog (Drosophila)                                                                                                                                                           |
| Plf2        | NM_011118 | 2.72  | 0.005762  | Proliferin 2                                                                                                                                                                                |
| Mmp9        | NM_013599 | 2.548 | 0.004398  | Matrix metalloproteinase 9                                                                                                                                                                  |
| Itgb7       | NM_013566 | 2.487 | 0.009466  | Integrin beta 7                                                                                                                                                                             |
| Rgs17       | NM_019958 | 2.379 | 0.002381  | Regulator of G-protein signaling 17                                                                                                                                                         |
| Galnt12     | NM_172693 | 2.223 | 0.004972  | UDP-N-acetyl-alpha-D-galactosamine:polypeptide N-acetylgalactosaminyltransferase 12                                                                                                         |
| B430212B02  | AK046628  | 2.215 | 0.008586  | Mus musculus 4 days neonate male adipose cDNA, RIKEN full-length enriched library, clone:B430212B02 product:METASTASIS SUPPRESSOR PROTEIN homolog [Homo sapiens], full insert sequence.     |
| Idb4        | NM_031166 | 2.125 | 0.0008178 | Inhibitor of DNA binding 4                                                                                                                                                                  |
| AK083036    | NM_177632 | 2.109 | 0.00344   | Mus musculus cDNA sequence BC022623 (BC022623), mRNA                                                                                                                                        |
| Gm440       | NM_198620 | 2.101 | 0.007315  | Gene model 440, (NCBI)                                                                                                                                                                      |
| AK018172    | AK018172  | 2.045 | 0.001678  | Mus musculus adult male medulla oblongata cDNA, RIKEN full-length enriched library, clone:6330414G02 product:unknown EST, full insert sequence.                                             |
| Tmem117     | NM_178789 | 2.042 | 0.005464  | Transmembrane protein 117                                                                                                                                                                   |
| Nfia        | NM_010905 | 2.029 | 0.007411  | Nuclear factor I/A                                                                                                                                                                          |
| Sox13       | NM_011439 | 1.977 | 0.00322   | SRY-box containing gene 13                                                                                                                                                                  |
| Dst         | NM_134448 | 1.968 | 0.007575  | Dystonin                                                                                                                                                                                    |
| Mtss1       | NM_144800 | 1.966 | 0.0003395 | Metastasis suppressor 1                                                                                                                                                                     |
| AK014046    | AK014046  | 1.962 | 0.006917  | Mus musculus 13 days embryo head cDNA, RIKEN full-length enriched library, clone:3110013H01 product:hypothetical protein, full insert sequence.                                             |
| Tspan7      | NM_019634 | 1.953 | 0.0006288 | Tetraspanin 7                                                                                                                                                                               |
| 1110006O17  | XM_358515 | 1.914 | 0.00447   | PREDICTED: Mus musculus RIKEN cDNA 1110006O17 gene (1110006O17Rik), mRNA                                                                                                                    |
| Slc22a4     | NM_019687 | 1.91  | 0.005801  | Solute carrier family 22 (organic cation transporter), member 4                                                                                                                             |
| Chd7        | BC034239  | 1.885 | 0.0009656 | chromodomain helicase DNA binding protein 7                                                                                                                                                 |
| Prkez       | NM_008860 | 1.878 | 0.003849  | Protein kinase C, zeta                                                                                                                                                                      |
| Rcor1       | NM_198023 | 1.868 | 0.004824  | REST corepressor 1                                                                                                                                                                          |

| Gene symbol | Genbank      | Fc    | P value   | Gene name                                                                                                                                                                 |
|-------------|--------------|-------|-----------|---------------------------------------------------------------------------------------------------------------------------------------------------------------------------|
| Rnase4      | NM_021472    | 1.843 | 0.00341   | Ribonuclease, RNase A family 4,transcript variant 1                                                                                                                       |
| Col5a3      | NM_016919    | 1.806 | 0.004074  | Procollagen, type V, alpha 3                                                                                                                                              |
| 4930571N02  | AK076954     | 1.789 | 0.001312  | Mus musculus adult male testis cDNA, RIKEN full-length enriched library, clone:4930571N02 product:unknown EST, full insert sequence.                                      |
| Pbx1        | BC058390     | 1.775 | 0.008481  | Pre B-cell leukemia transcription factor 1, transcript variant a                                                                                                          |
| Serinc2     | NM_172702    | 1.774 | 0.009237  | Serine incorporator 2                                                                                                                                                     |
| Artn        | NM_009711    | 1.772 | 0.0005232 | Artemin                                                                                                                                                                   |
| Apbb1       | NM_009685    | 1.768 | 0.004511  | Amyloid beta (A4) precursor protein-binding, family B, member 1                                                                                                           |
| Bckdhh      | NM_199195    | 1.755 | 0.005258  | Branched chain ketoacid dehydrogenase E1, beta polypeptide                                                                                                                |
| Cyp2j6      | NM_010008    | 1.746 | 0.001128  | Cytochrome P450, family 2, subfamily j, polypeptide 6                                                                                                                     |
| Bckdhh      | NM_199195    | 1.738 | 0.001037  | Branched chain ketoacid dehydrogenase E1, beta polypeptide                                                                                                                |
| AK046403    | NM_172772    | 1.716 | 0.003822  | Mus musculus RIKEN cDNA B230380D07 gene (B230380D07Rik), mRNA                                                                                                             |
| Chmp6       | XM_126613    | 1.708 | 0.0008554 | PREDICTED: Mus musculus chromatin modifying protein 6, transcript variant 1 , mRNAgi 94391054 ref XM_126613.6 [94391054]                                                  |
| Idb4        | NM_031166    | 1.703 | 0.004498  | Inhibitor of DNA binding 4                                                                                                                                                |
| AK043559    | NM_146115    | 1.677 | 0.00415   | Mus musculus RIKEN cDNA A830007P12 gene (A830007P12Rik), mRNA                                                                                                             |
| Cenpb       | NM_007682    | 1.667 | 0.009602  | Centromere autoantigen B                                                                                                                                                  |
| Hgf         | NM_010427    | 1.661 | 0.007777  | Hepatocyte growth factor                                                                                                                                                  |
| Arf2        | NM_007477    | 1.659 | 0.0006219 | ADP-ribosylation factor 2                                                                                                                                                 |
| Bptf        | BC060715     | 1.655 | 0.001699  | Bromodomain PHD finger transcription factor                                                                                                                               |
| AK011976    | AK011976     | 1.644 | 0.006899  | Mus musculus 10 days embryo whole body cDNA, RIKEN full-length enriched library, clone:2610304B20 product:ANGIOPOIETIN-RELATED PROTEIN 2 PRECURSOR, full insert sequence. |
| Fgfr1       | NM_010206    | 1.64  | 0.009768  | Fibroblast growth factor receptor 1                                                                                                                                       |
| Odam        | NM_027128    | 1.634 | 0.005028  | Odontogenic, ameloblast associated                                                                                                                                        |
| Ssbp4       | NM_133772    | 1.633 | 0.003184  | Single stranded DNA binding protein 4                                                                                                                                     |
| Zfp336      | NM_028986    | 1.63  | 0.004652  | Zinc finger protein 336                                                                                                                                                   |
| Ube2g2      | NM_019803    | 1.63  | 0.0007305 | Ubiquitin-conjugating enzyme E2G 2                                                                                                                                        |
| AK013562    | AK013562     | 1.627 | 0.0005184 | Mus musculus adult male hippocampus cDNA, RIKEN full-length enriched library, clone:2900019M05 product:unknown EST, full insert sequence.                                 |
| NAP026755-1 | U40751       | 1.626 | 3.39E-05  | Mus musculus formin binding protein 17 mRNA, partial cds.                                                                                                                 |
| Lrrc5       | NM_178701    | 1.622 | 0.001008  | Leucine rich repeat containing 5                                                                                                                                          |
| Gent1       | NM_010265    | 1.617 | 0.00537   | Glucosaminyl (N-acetyl) transferase 1, core 2                                                                                                                             |
| Clcf1       | NM_019952    | 1.615 | 0.009329  | Cardiotrophin-like cytokine factor 1                                                                                                                                      |
| Pgam2       | NM_018870    | 1.613 | 0.00117   | Phosphoglycerate mutase 2                                                                                                                                                 |
| Sigirr      | NM_023059    | 1.604 | 0.003115  | Single immunoglobulin and toll-interleukin 1 receptor (TIR) domain                                                                                                        |
| Epb4.1l2    | NM_013511    | 1.602 | 0.007072  | Erythrocyte protein band 4.1-like 2                                                                                                                                       |
| A530021L18  | AK034149     | 1.6   | 0.006534  | Mus musculus adult male diencephalon cDNA, RIKEN full-length enriched library, clone:9330159M07 product: unknown EST, full insert sequence.                               |
| Scmh1       | NM_013883    | 1.598 | 0.009705  | Sex comb on midleg homolog 1                                                                                                                                              |
| Pcnt2       | NM_008787    | 1.593 | 0.002313  | pericentrin 2                                                                                                                                                             |
| Kail        | NM_007656    | 1.57  | 0.001681  | Kangai 1 (suppression of tumorigenicity 6, prostate) 56]                                                                                                                  |
| Tmem138     | NM_028411    | 1.569 | 0.0006819 | Transmembrane protein 138                                                                                                                                                 |
| Rdh10       | NM_133832    | 1.566 | 0.003229  | Retinol dehydrogenase 10 (all-trans)                                                                                                                                      |
| Arhgef19    | NM_172520    | 1.557 | 0.006896  | Rho guanine nucleotide exchange factor (GEF) 19                                                                                                                           |
| Pea15       | NM_011063    | 1.55  | 0.005386  | Phosphoprotein enriched in astrocytes 15                                                                                                                                  |
| Gent1       | NM_010265    | 1.549 | 0.008038  | Glucosaminyl (N-acetyl) transferase 1, core 2                                                                                                                             |
| AK053734    | NM_175538    | 1.542 | 0.002333  | Mus musculus RIKEN cDNA E130304F04 gene (E130304F04Rik), mRNA                                                                                                             |
| Kif11       | NM_010615    | 1.539 | 0.00542   | Kinesin family member 11                                                                                                                                                  |
| Srp68       | NM_146032    | 1.535 | 0.00251   | Signal recognition particle 68                                                                                                                                            |
| Uap1l1      | NM_001033293 | 1.535 | 0.00476   | UDP-N-actylglucosamine pyrophosphorylase 1-like 1                                                                                                                         |
| Igfbp2      | NM_008342    | 1.534 | 0.008347  | Insulin-like growth factor binding protein 2                                                                                                                              |

| Gene symbol | Genbank   | Fc    | P value   | Gene name                                                                                                                                                 |
|-------------|-----------|-------|-----------|-----------------------------------------------------------------------------------------------------------------------------------------------------------|
| Mier2       | NM_027422 | 1.527 | 0.008379  | Mesoderm induction early response 1, family member 2                                                                                                      |
| Becl1       | NM_019584 | 1.516 | 0.002009  | Beclin 1 (coiled-coil, myosin-like BCL2-interacting protein)                                                                                              |
| Spink2      | NM_183284 | 1.512 | 0.006357  | Serine protease inhibitor, Kazal type 2                                                                                                                   |
| Zfp444      | NM_028316 | 1.511 | 0.0005841 | Zinc finger protein 444                                                                                                                                   |
| Cdc23       | NM_178347 | 1.51  | 0.005276  | CDC23 (cell division cycle 23, yeast, homolog)                                                                                                            |
| Egr3        | AK078299  | 1.509 | 0.004892  | Mus musculus adult male olfactory brain cDNA, RIKEN full-length enriched library, clone:6430581J15 product:early growth response 3, full insert sequence. |
| Vangl1      | NM_177545 | 1.507 | 0.0006447 | Vang, van gogh-like 1 (Drosophila)                                                                                                                        |
| AK040924    | NM_172725 | 1.504 | 0.005549  | Mus musculus RIKEN cDNA C330006K01 gene (C330006K01Rik), mRNA                                                                                             |
| Calr3       | NM_028500 | 1.501 | 0.004136  | Calreticulin 3                                                                                                                                            |
| Mapk8ip     | NM_011162 | 1.501 | 0.008576  | Mitogen activated protein kinase 8 interacting protein 1                                                                                                  |

Down regulated genes, K314/315R (45' TNF $\alpha$ ) versus wild type (45' TNF $\alpha$ ),  $f_c < 0.667$ ,  $p \leq 0.01$

| Gene symbol   | Genbank   | Fc      | P value   | Gene name                                                                                                                                                                                                                                                                            |
|---------------|-----------|---------|-----------|--------------------------------------------------------------------------------------------------------------------------------------------------------------------------------------------------------------------------------------------------------------------------------------|
| Cnn1          | NM_009922 | 0.07261 | 0.0008612 | Calponin 1                                                                                                                                                                                                                                                                           |
| NAP000805-003 | XM_620550 | 0.1136  | 1.68E-05  | PREDICTED: Mus musculus hypothetical protein A630026L20 (A630026L20), mRNA                                                                                                                                                                                                           |
| AK007972      | XM_283793 | 0.1351  | 0.000661  | PREDICTED: Mus musculus similar to Myl9 protein (LOC433496), mRNA                                                                                                                                                                                                                    |
| Tagln         | NM_011526 | 0.2581  | 0.008987  | Transgelin                                                                                                                                                                                                                                                                           |
| Ifi44         | NM_133871 | 0.2585  | 0.009487  | Interferon-induced protein 44                                                                                                                                                                                                                                                        |
| Acta2         | NM_007392 | 0.2899  | 0.008467  | Actin, alpha 2, smooth muscle, aorta                                                                                                                                                                                                                                                 |
| Tagln         | NM_011526 | 0.3174  | 0.0054    | Transgelin (Tagln)                                                                                                                                                                                                                                                                   |
| Plac8         | NM_139198 | 0.3239  | 0.004206  | Placenta-specific 8                                                                                                                                                                                                                                                                  |
| Oas1f         | NM_145153 | 0.3408  | 0.003982  | 2'-5' oligoadenylate synthetase 1F                                                                                                                                                                                                                                                   |
| Gvin1         | NM_029000 | 0.3722  | 0.001799  | GTPase, very large interferon inducible 1                                                                                                                                                                                                                                            |
| Sorbs1        | NM_009166 | 0.4026  | 0.0003775 | Sorbin and SH3 domain containing 1                                                                                                                                                                                                                                                   |
| Fbln5         | NM_011812 | 0.4028  | 0.003834  | Fibulin 5                                                                                                                                                                                                                                                                            |
| Thy1          | NM_009382 | 0.4036  | 0.00211   | Thymus cell antigen 1, theta                                                                                                                                                                                                                                                         |
| Cdc42ep3      | NM_026514 | 0.4164  | 0.006761  | CDC42 effector protein (Rho GTPase binding) 3                                                                                                                                                                                                                                        |
| Ifit1         | NM_008331 | 0.4207  | 0.009178  | Interferon-induced protein with tetratricopeptide repeats 1                                                                                                                                                                                                                          |
| H2-DMb1       | NM_010387 | 0.4246  | 0.009563  | Histocompatibility 2, class II, locus Mb1                                                                                                                                                                                                                                            |
| Itgbl1        | NM_145467 | 0.4335  | 0.0003652 | Integrin, beta-like 1                                                                                                                                                                                                                                                                |
| Elav12        | NM_207685 | 0.4475  | 0.004011  | ELAV (embryonic lethal, abnormal vision, Drosophila)-like 2 (Hu antigen B), transcript variant 1                                                                                                                                                                                     |
| NAP016003-001 | AK173296  | 0.4687  | 0.005727  | Mus musculus mRNA for mKIAA1910 protein                                                                                                                                                                                                                                              |
| Ifi27         | NM_029803 | 0.471   | 0.00435   | Interferon, alpha-inducible protein 27                                                                                                                                                                                                                                               |
| Kcnab1        | NM_010597 | 0.4785  | 0.002923  | Potassium voltage-gated channel, shaker-related subfamily, beta member 1                                                                                                                                                                                                             |
| A130082H20    | AK038152  | 0.4796  | 0.009408  | Mus musculus 16 days neonate thymus cDNA, RIKEN full-length enriched library, clone:A130082H20 product:unknown EST, full insert sequence.                                                                                                                                            |
| NAP123686-1   |           | 0.4856  | 2.86E-05  | Q8BU53 (Q8BU53) Mus musculus 2 days pregnant adult female oviduct cDNA, RIKEN full-length enriched library, clone:E230038K10 product:procollagen-proline, 2-oxoglutarate 4-dioxygenase (proline 4-hydroxylase), alpha II polypeptide, full insert sequence, partial (9%) [TC1534656] |
| C1q1          | NM_153155 | 0.4914  | 0.001004  | C1q-like 3 (C1q13)                                                                                                                                                                                                                                                                   |
| Iigp2         | NM_019440 | 0.5225  | 0.003736  | Interferon inducible GTPase 2                                                                                                                                                                                                                                                        |
| Hcn3          | NM_008227 | 0.5257  | 0.00182   | Hyperpolarization-activated, cyclic nucleotide-gated K+ 3                                                                                                                                                                                                                            |
| AK011178      | NM_175181 | 0.5265  | 0.005301  | Mus musculus RIKEN cDNA 2600010E01 gene (2600010E01Rik), mRNA                                                                                                                                                                                                                        |
| C130073O12    | AK081751  | 0.532   | 0.0003424 | Mus musculus 16 days embryo head cDNA, RIKEN full-length enriched library, clone:C130073O12 product:hypothetical protein, full insert sequence.                                                                                                                                      |
| AK009386      | NM_173743 | 0.5533  | 0.009058  | Mus musculus RIKEN cDNA 2310016F22 gene (2310016F22Rik), mRNA                                                                                                                                                                                                                        |
| AK003718      | AK003718  | 0.5536  | 0.008797  | Mus musculus 18-day embryo whole body cDNA, RIKEN full-length enriched library, clone:1110014O20 product:unknown EST, full insert sequence.                                                                                                                                          |
| Dusp2         | NM_010090 | 0.5694  | 0.005141  | Dual specificity phosphatase 2                                                                                                                                                                                                                                                       |
| AK002271      | AK077713  | 0.5699  | 0.009951  | Mus musculus 8 days embryo whole body cDNA, RIKEN full-length enriched library, clone:5730544G20 product:tropomyosin 2, beta, full insert sequence.                                                                                                                                  |
| AF027504      | AF027504  | 0.5756  | 0.0005015 | Mus musculus putative membrane-associated guanylate kinase 1 (Magi-1) mRNA, alternatively spliced a form, partial cds.                                                                                                                                                               |
| Ifit3         | NM_010501 | 0.5841  | 0.002205  | Interferon-induced protein with tetratricopeptide repeats 3                                                                                                                                                                                                                          |
| Ghr           | NM_010284 | 0.5924  | 0.006823  | Growth hormone receptor                                                                                                                                                                                                                                                              |
| AK077046      | AK077045  | 0.6013  | 0.004613  | Mus musculus adult male testis cDNA, RIKEN full-length enriched library, clone:4932437H03 product:similar to CENTROSOMAL P4.1-ASSOCIATED PROTEIN [Homo sapiens], full insert sequence                                                                                                |
| Acyp2         | NM_029344 | 0.6042  | 0.0004314 | Acylphosphatase 2, muscle type                                                                                                                                                                                                                                                       |
| Rgmb          | NM_178615 | 0.6101  | 0.008222  | Mus musculus RGM domain family, member B                                                                                                                                                                                                                                             |
| Rhbd16        | NM_172572 | 0.6113  | 0.008553  | Mus musculus rhomboid, veinlet-like 6 (Drosophila)                                                                                                                                                                                                                                   |
| Hoxc5         | NM_175730 | 0.6135  | 0.0055    | Homeo box C5                                                                                                                                                                                                                                                                         |
| 6330400M01    | AK122576  | 0.6135  | 0.007873  | Mus musculus mRNA for mKIAA3001 protein                                                                                                                                                                                                                                              |

| Gene symbol | Genbank   | Fc     | P value   | Gene name                                                                                                                                                                  |
|-------------|-----------|--------|-----------|----------------------------------------------------------------------------------------------------------------------------------------------------------------------------|
| Nudcd2      | NM_026023 | 0.62   | 0.001695  | NudC domain containing 2                                                                                                                                                   |
| Trim25      | NM_009546 | 0.6238 | 0.00092   | Tripartite motif protein 25                                                                                                                                                |
| 5330408M09  | AK008077  | 0.6255 | 0.007705  | Mus musculus adult male small intestine cDNA, RIKEN full-length enriched library, clone:2010003O02 product:unknown EST, full insert sequence.                              |
| Antxr1      | NM_054041 | 0.6285 | 0.007571  | Anthrax toxin receptor 1                                                                                                                                                   |
| Npr3        | AK040677  | 0.6295 | 0.001028  | Mus musculus adult male aorta and vein cDNA, RIKEN full-length enriched library, clone:A530014A01 product:natriuretic peptide receptor 3, full insert sequence             |
| 9530083M20  | AK035669  | 0.6391 | 0.0007249 | Mus musculus adult male urinary bladder cDNA, RIKEN full-length enriched library, clone:9530083L01 product:hypothetical C2 domain containing protein, full insert sequence |
| Tmem144     | NM_027495 | 0.6424 | 0.009034  | Transmembrane protein 144                                                                                                                                                  |
| Cng1        | NM_009831 | 0.6465 | 0.007879  | Cyclin G1                                                                                                                                                                  |
| Stc2        | NM_011491 | 0.6546 | 0.005278  | Stanniocalcin 2                                                                                                                                                            |
| AK089315    | AK089315  | 0.6553 | 0.002837  | Mus musculus B6-derived CD11 +ve dendritic cells cDNA, RIKEN full-length enriched library, clone:F730004F21 product:thrombospondin 1, full insert sequence.                |
| AK019847    | AK019845  | 0.6573 | 0.003344  | Mus musculus adult male testis cDNA, RIKEN full-length enriched library, clone:4930599F06 product:DEAD                                                                     |
| 4831405L17  | AK029175  | 0.6586 | 0.003707  | Mus musculus 0 day neonate head cDNA, RIKEN full-length enriched library, clone:4831405L17 product:unclassifiable, full insert sequence                                    |
| Stag2       | AK077318  | 0.6613 | 0.009141  | Mus musculus adult male pituitary gland cDNA, RIKEN full-length enriched library, clone:5330413G05 product:stromal antigen 2, full insert sequence.                        |
