# Supplementary material for: Functional relevance of novel p300-mediated lysine 314 and 315 acetylation of RelA/p65
Source: PubMed Central journal article supplement — Nucleic Acids Res. 2008 Feb 7;36(5):1665–80. doi: 10.1093/nar/gkn003 (PMC2275151; doi:10.1093/nar/gkn003), 2008-02-07
Supplement: nar_gkn003_4.pdf [file nar_gkn003_4.pdf]

Table S3.

Up regulated genes, KTR (45' TNF $\alpha$ ) versus wild type (45' TNF $\alpha$ ),  $f_c > 1.5$ ,  $p \leq 0.01$ 

| Gene symbol   | Genbank   | Fc    | P value   | Gene name                                                                                                                                                                                   |
|---------------|-----------|-------|-----------|---------------------------------------------------------------------------------------------------------------------------------------------------------------------------------------------|
| 1700003J08    | NM_026594 | 18.35 | 0.002648  | Mus musculus RIKEN cDNA 4930517K11 gene (4930517K11Rik), mRNA                                                                                                                               |
| Errfi1        | BC057646  | 11.74 | 0.001774  | ERBB receptor feedback inhibitor 1                                                                                                                                                          |
| Peg12         | NM_013788 | 6.696 | 0.0009289 | Paternally expressed 12                                                                                                                                                                     |
| Lmo1          | NM_057173 | 6.115 | 0.001363  | LIM domain only 1                                                                                                                                                                           |
| Dlk1          | NM_010052 | 5.408 | 0.0008111 | Delta-like 1 homolog (Drosophila)                                                                                                                                                           |
| A830059I20Rik | NM_021427 | 4.859 | 0.001037  | Mus musculus RIKEN cDNA A830059I20 gene (A830059I20Rik), mRNA                                                                                                                               |
| Dlk1          | NM_010052 | 4.703 | 0.0003127 | Delta-like 1 homolog (Drosophila)                                                                                                                                                           |
| Frat1         | NM_008043 | 4.577 | 0.001661  | Frequently rearranged in advanced T-cell lymphomas                                                                                                                                          |
| Frat1         | NM_008043 | 4.351 | 0.002953  | Frequently rearranged in advanced T-cell lymphomas                                                                                                                                          |
| Ch25h         | NM_009890 | 4.03  | 0.009872  | Cholesterol 25-hydroxylase                                                                                                                                                                  |
| AK004158      | AK004158  | 3.636 | 0.009822  | Mus musculus 18-day embryo whole body cDNA, RIKEN full-length enriched library, clone:1110038H03 product:unknown EST, full insert sequence.                                                 |
| BC013191      | NM_133751 | 3.506 | 0.0001906 | Mus musculus RIKEN cDNA 1700060H10 gene (1700060H10Rik), mRNA RECORD removed                                                                                                                |
| 2900084M21    | AK041604  | 3.037 | 0.00983   | Mus musculus 3 days neonate thymus cDNA, RIKEN full-length enriched library, clone:A630024E20 product:weakly similar to HYPOTHETICAL 39.6 KDA PROTEIN [Homo sapiens], full insert sequence. |
| Nap113        | AK078521  | 3.017 | 0.009327  | Nucleosome assembly protein 1-like 3                                                                                                                                                        |
| Sirpa         | BC062197  | 2.871 | 0.006133  | Signal-regulatory protein alpha, mRNA                                                                                                                                                       |
| Afap112       | NM_146102 | 2.855 | 0.008797  | Actin filament associated protein 1-like 2                                                                                                                                                  |
| Chd7          | BC034239  | 2.817 | 0.002232  | Chromodomain helicase DNA binding protein 7                                                                                                                                                 |
| Plf2          | NM_011118 | 2.797 | 0.005527  | Proliferin 2                                                                                                                                                                                |
| B230334H23    | AK083105  | 2.634 | 0.0003791 | Mus musculus adult male hippocampus cDNA, RIKEN full-length enriched library, clone:C630014L24 product:weakly similar to BRAIN CDNA, CLONE MNCB-0335 [Mus musculus], full insert sequence   |
| Mtss1         | NM_144800 | 2.629 | 0.001887  | Metastasis suppressor 1                                                                                                                                                                     |
| Afp           | NM_007423 | 2.607 | 0.001128  | Alpha fetoprotein                                                                                                                                                                           |
| Mrpplf4       | NM_181852 | 2.598 | 0.003866  | Mitogen regulated protein, proliferin 4                                                                                                                                                     |
| Eya2          | NM_010165 | 2.591 | 0.005339  | Eyes absent 2 homolog (Drosophila)                                                                                                                                                          |
| Plf2          | NM_011118 | 2.571 | 0.005067  | Mus musculus proliferin 2 (Plf2), mRNA [NM_011118]                                                                                                                                          |
| NAP024473-001 | AK008856  | 2.569 | 0.004169  | Mus musculus adult male stomach cDNA, RIKEN full-length enriched library, clone:2210408F11 product:unknown EST, full insert sequence.                                                       |
| Kcnmb4        | NM_021452 | 2.407 | 0.001116  | Potassium large conductance calcium-activated channel, subfamily M, beta member 4                                                                                                           |
| Vegfc         | NM_009506 | 2.286 | 0.002001  | Vascular endothelial growth factor C                                                                                                                                                        |
| Serpinb6b     | NM_011454 | 2.277 | 0.007689  | Serine (or cysteine) proteinase inhibitor, clade B, member 6b                                                                                                                               |
| Grem1         | NM_011824 | 2.263 | 0.006437  | Gremlin 1                                                                                                                                                                                   |
| Aim1          | NM_172393 | 2.232 | 0.004676  | Absent in melanoma 1                                                                                                                                                                        |
| Gspt2         | NM_008179 | 2.216 | 0.00759   | G1 to S phase transition 2                                                                                                                                                                  |
| Gent1         | NM_173442 | 2.207 | 0.0009692 | Glucosaminyl (N-acetyl) transferase 1, core 2                                                                                                                                               |
| Herc3         | NM_028705 | 2.188 | 0.002376  | Hect domain and RLD 3                                                                                                                                                                       |
| Uch11         | NM_011670 | 2.167 | 0.0005275 | Ubiquitin carboxy-terminal hydrolase L1                                                                                                                                                     |
| Aph1a         | NM_146104 | 2.164 | 0.002168  | Anterior pharynx defective 1a homolog (C. elegans)                                                                                                                                          |
| Sorbs2        | BC039163  | 2.116 | 0.004391  | Sorbin and SH3 domain containing 2                                                                                                                                                          |
| B230339K08    | NM_153557 | 2.114 | 0.008964  | Mus musculus cDNA sequence BC029214 (BC029214), mRNA                                                                                                                                        |
| Lama5         | U37501    | 2.111 | 0.004135  | Laminin alpha 5 chain                                                                                                                                                                       |
| Msrb2         | NM_029619 | 2.097 | 0.003282  | Methionine sulfoxide reductase B2                                                                                                                                                           |
| RPTP-beta     | AJ428208  | 2.065 | 0.00691   | Phosphacan short isoform (RPTP-beta gene)                                                                                                                                                   |

| Gene symbol   | Genbank   | Fc    | P value   | Gene name                                                                                                                                       |
|---------------|-----------|-------|-----------|-------------------------------------------------------------------------------------------------------------------------------------------------|
| Rpl7a         | NM_013721 | 2.065 | 0.006911  | Ribosomal protein L7a                                                                                                                           |
| Rps23         | NM_024175 | 2.065 | 0.006896  | Ribosomal protein S23                                                                                                                           |
| Arbp          | NM_007475 | 2.065 | 0.00691   | Acidic ribosomal phosphoprotein P0                                                                                                              |
| S100a6        | NM_011313 | 2.065 | 0.00691   | S100 calcium binding protein A6 (calyculin)                                                                                                     |
| Rplp1         | NM_018853 | 2.065 | 0.006908  | Ribosomal protein, large, P1                                                                                                                    |
| Rps18         | NM_011296 | 2.06  | 0.00659   | Ribosomal protein S18                                                                                                                           |
| Sox13         | NM_011439 | 2.037 | 0.001008  | SRY-box containing gene 13                                                                                                                      |
| Tspan7        | NM_019634 | 2.03  | 0.004973  | Tetraspanin 7                                                                                                                                   |
| S100a4        | NM_011311 | 2.017 | 0.005302  | S100 calcium binding protein A4                                                                                                                 |
| Gsta4         | NM_010357 | 2.011 | 0.008301  | Glutathione S-transferase, alpha 4                                                                                                              |
| Rpl13         | NM_016738 | 2.008 | 0.004638  | Ribosomal protein L13                                                                                                                           |
| Cdy12         | NM_029441 | 2.003 | 0.005258  | Chromodomain protein, Y chromosome-like 2                                                                                                       |
| Prkg2         | NM_008926 | 1.994 | 0.002933  | Protein kinase, cGMP-dependent, type II                                                                                                         |
| Rplp2         | NM_026020 | 1.988 | 0.004198  | Ribosomal protein, large P2                                                                                                                     |
| Rps2          | NM_008503 | 1.966 | 0.007333  | Ribosomal protein S2                                                                                                                            |
| Ralgps2       | NM_023884 | 1.958 | 0.009077  | Ral GEF with PH domain and SH3 binding motif 2                                                                                                  |
| AK014046      | AK014046  | 1.939 | 0.007203  | Mus musculus 13 days embryo head cDNA, RIKEN full-length enriched library, clone:3110013H01 product:hypothetical protein, full insert sequence. |
| Hgf           | NM_010427 | 1.926 | 0.005215  | Hepatocyte growth factor                                                                                                                        |
| Rps2          | BC002186  | 1.925 | 0.003953  | Ribosomal protein S2                                                                                                                            |
| NAP018710-001 | XM_622627 | 1.915 | 0.008027  | PREDICTED: Mus musculus similar to cytoplasmic beta-actin (LOC547246), mRNA Record removed                                                      |
| AK018172      | AK018172  | 1.892 | 0.0009341 | Mus musculus adult male medulla oblongata cDNA, RIKEN full-length enriched library, clone:6330414G02 product:unknown EST, full insert sequence. |
| Nr2f2         | BC094360  | 1.888 | 0.001832  | Nuclear receptor subfamily 2, group F                                                                                                           |
| 1600021P15    | BC068245  | 1.886 | 0.003554  | Mus musculus hypothetical protein A430031N04, mRNA (cDNA clone IMAGE:30020951), containing frame-shift errors.                                  |
| Rpl27         | NM_011289 | 1.884 | 0.007164  | Ribosomal protein L27                                                                                                                           |
| NAP102738-1   |           | 1.881 | 0.002468  |                                                                                                                                                 |
| B230317C12Rik | NM_019833 | 1.866 | 0.009679  | Mus musculus RIKEN cDNA B230317C12 gene (B230317C12Rik), mRNA [NM_019833]                                                                       |
| Gsdmhc1       | NM_026960 | 1.862 | 0.00718   | Gasdermin domain containing 1                                                                                                                   |
| Uch11         | NM_011670 | 1.862 | 0.005661  | Ubiquitin carboxy-terminal hydrolase L1                                                                                                         |
| Lrrc5         | NM_178701 | 1.859 | 0.008041  | Leucine rich repeat containing 5                                                                                                                |
| Fez1          | NM_183171 | 1.857 | 0.009523  | Fasciculation and elongation protein zeta 1 (zygin I)                                                                                           |
| Rpl41         | NM_018860 | 1.835 | 0.009654  | Ribosomal protein L41                                                                                                                           |
| Itgb7         | NM_013566 | 1.833 | 0.001309  | Integrin beta 7                                                                                                                                 |
| BC026410      | XM_110660 | 1.826 | 0.002532  | PREDICTED: Mus musculus expressed sequence AI427122 (AI427122), mRNA                                                                            |
| Trmt12        | NM_026642 | 1.813 | 0.005393  | tRNA methyltransferase 12 homolog (S. cerevisiae)                                                                                               |
| Agpat2        | NM_026212 | 1.804 | 0.003567  | 1-acylglycerol-3-phosphate O-acyltransferase 2 (lysophosphatidic acid acyltransferase, beta)                                                    |
| BC024599      | NM_145144 | 1.796 | 0.00666   | Mus musculus RIKEN cDNA 2810003C17 gene (2810003C17Rik), mRNA                                                                                   |
| Eef1a1        | NM_010106 | 1.791 | 0.001097  | Eukaryotic translation elongation factor 1 alpha 1                                                                                              |
| Mgst1         | NM_019946 | 1.789 | 0.007538  | Microsomal glutathione S-transferase 1                                                                                                          |
| Igfbp6        | NM_008344 | 1.788 | 0.005259  | Insulin-like growth factor binding protein 6                                                                                                    |
| Dusp9         | NM_029352 | 1.779 | 0.009205  | Dual specificity phosphatase 9                                                                                                                  |
| Cacna2d1      | NM_009784 | 1.777 | 0.0008515 | Calcium channel, voltage-dependent, alpha2/delta subunit 1                                                                                      |
| 2310005P05Rik | NM_026189 | 1.771 | 0.0004902 | Mus musculus RIKEN cDNA 2310005P05 gene (2310005P05Rik), mRNA                                                                                   |

| Gene symbol   | Genbank      | Fc    | P value   | Gene name                                                                                                                                                                          |
|---------------|--------------|-------|-----------|------------------------------------------------------------------------------------------------------------------------------------------------------------------------------------|
| Rps2          | NM_008503    | 1.768 | 0.005996  | Ribosomal protein S2                                                                                                                                                               |
| Rpl8          | NM_012053    | 1.762 | 0.00715   | Ribosomal protein L8                                                                                                                                                               |
| Gent1         | NM_010265    | 1.76  | 0.002805  | Glucosaminyl (N-acetyl) transferase 1, core 2                                                                                                                                      |
| NAP000014-001 | XM_139845    | 1.76  | 0.001374  | PREDICTED: Mus musculus similar to 40S ribosomal protein S2 (LOC207695), mRNA                                                                                                      |
| Epb4.114a     | NM_013512    | 1.751 | 0.003864  | Erythrocyte protein band 4.1-like 4a                                                                                                                                               |
| Rps20         | NM_026147    | 1.734 | 0.005857  | Ribosomal protein S20                                                                                                                                                              |
| AK013404      | AK013404     | 1.726 | 0.001097  | Mus musculus 10, 11 days embryo whole body cDNA, RIKEN full-length enriched library, clone:2810473M14 product:unknown EST, full insert sequence.                                   |
| Hspb1         | NM_013560    | 1.724 | 0.001141  | Heat shock protein 1                                                                                                                                                               |
| Pld2          | NM_008876    | 1.721 | 0.0003183 | Phospholipase D2                                                                                                                                                                   |
| Ccl7          | NM_013654    | 1.717 | 0.007916  | Chemokine (C-C motif) ligand 7                                                                                                                                                     |
| Ahnak         | NM_009643    | 1.714 | 0.00722   | AHNAK nucleoprotein (desmoyokin), transcript variant 1                                                                                                                             |
| NAP105475-1   | BB794657     | 1.714 | 0.007837  | BB794657 RIKEN full-length enriched, RCB-0545 OHTA cDNA Mus musculus cDNA clone G431001F07 3', mRNA sequence                                                                       |
| Rps12         | NM_011295    | 1.708 | 0.004895  | Ribosomal protein S12                                                                                                                                                              |
| Chst1         | NM_023850    | 1.694 | 0.003881  | Carbohydrate (keratan sulfate Gal-6) sulfotransferase 1                                                                                                                            |
| Nsd1          | AF419220     | 1.694 | 0.006179  | Mus musculus NSD1 (Nsd1) mRNA                                                                                                                                                      |
| D030047M17    | AK050968     | 1.688 | 0.0021    | Mus musculus 9 days embryo whole body cDNA, RIKEN full-length enriched library, clone:D030047M17 product:unknown EST, full insert sequence.                                        |
| BC011413      | BC011413     | 1.688 | 0.005361  | Mus musculus mRNA similar to ribosomal protein S20 (cDNA clone MGC:6876 IMAGE:2651405), complete cds.                                                                              |
| 5730590C14    | AK019982     | 1.685 | 0.005926  | Mus musculus 8 days embryo whole body cDNA, RIKEN full-length enriched library, clone:5730590C14 product:hypothetical protein, full insert sequence.                               |
| Ccnu          | NM_001081062 | 1.677 | 0.003367  | Cyclin U                                                                                                                                                                           |
| Arc           | NM_018790    | 1.675 | 0.001617  | Activity regulated cytoskeletal-associated protein                                                                                                                                 |
| Esam1         | NM_027102    | 1.669 | 0.005291  | Endothelial cell-specific adhesion molecule                                                                                                                                        |
| Bcl6b         | NM_007528    | 1.66  | 0.003199  | B-cell CLL/lymphoma 6, member B                                                                                                                                                    |
| Cpt1a         | NM_013495    | 1.658 | 0.004859  | Carnitine palmitoyltransferase 1a, liver                                                                                                                                           |
| Rnase4        | NM_021472    | 1.657 | 0.003964  | Ribonuclease, RNase A family 4, transcript variant 1                                                                                                                               |
| NAP030187-1   | XM_621546    | 1.657 | 0.0073    | PREDICTED: Mus musculus similar to Ribosomal protein S2 (LOC546762), mRNA                                                                                                          |
| Ssbp4         | NM_133772    | 1.643 | 0.004925  | Single stranded DNA binding protein 4                                                                                                                                              |
| Baz1b         | NM_011714    | 1.634 | 0.004559  | Bromodomain adjacent to zinc finger domain, 1B                                                                                                                                     |
| Msi2h         | NM_054043    | 1.631 | 0.0004653 | Musashi homolog 2 (Drosophila)                                                                                                                                                     |
| Npepl1        | NM_213733    | 1.629 | 0.006615  | Aminopeptidase-like 1                                                                                                                                                              |
| Rdh10         | NM_133832    | 1.628 | 0.005945  | Retinol dehydrogenase 10 (all-trans)                                                                                                                                               |
| B230213G13    | AK045584     | 1.626 | 0.001333  | Mus musculus adult male corpora quadrigemina cDNA, RIKEN full-length enriched library, clone:B230213G13 product:unknown EST, full insert sequence.                                 |
| AK087176      | AK086107     | 1.622 | 0.005674  | Mus musculus 15 days embryo head cDNA, RIKEN full-length enriched library, clone:D930006D18 product:MYOFERLIN (FER-1 LIKE PROTEIN 3) homolog [Homo sapiens], full insert sequence. |
| Atp1b1        | NM_009721    | 1.622 | 0.005489  | ATPase, Na <sup>+</sup> /K <sup>+</sup> transporting, beta 1 polypeptide                                                                                                           |
| Mgst1         | NM_019946    | 1.614 | 0.008024  | Microsomal glutathione S-transferase 1                                                                                                                                             |
| Gent1         | NM_010265    | 1.613 | 0.004347  | Glucosaminyl (N-acetyl) transferase 1, core 2                                                                                                                                      |
| Kctd11        | NM_153143    | 1.61  | 0.007914  | Potassium channel tetramerisation domain containing 11                                                                                                                             |
| AK043559      | NM_146115    | 1.607 | 0.003823  | Mus musculus RIKEN cDNA A830007P12 gene (A830007P12Rik), mRNA                                                                                                                      |

| Gene symbol | Genbank      | Fc    | P value   | Gene name                                                                                                                                                                    |
|-------------|--------------|-------|-----------|------------------------------------------------------------------------------------------------------------------------------------------------------------------------------|
| Tgfa        | NM_031199    | 1.6   | 0.007911  | Transforming growth factor alpha                                                                                                                                             |
| 4930527A11  | XM_134948    | 1.596 | 0.0002187 | PREDICTED: Mus musculus RIKEN cDNA 2410076I21 gene (2410076I21Rik), mRNA                                                                                                     |
| NAP102091-1 |              | 1.594 | 0.008282  |                                                                                                                                                                              |
| Pcolce2     | NM_029620    | 1.593 | 0.002171  | Procollagen C-endopeptidase enhancer 2                                                                                                                                       |
| Apbb1       | NM_009685    | 1.59  | 0.001705  | Amyloid beta (A4) precursor protein-binding, family B, member 1                                                                                                              |
| NAP027878-1 |              | 1.583 | 0.006496  |                                                                                                                                                                              |
| Centd3      | NM_139206    | 1.582 | 0.00594   | Centaurin, delta 3                                                                                                                                                           |
| Ptpn11      | BC059278     | 1.57  | 0.002272  | Protein tyrosine phosphatase, non-receptor type 11                                                                                                                           |
| 8030467K01  | AK033222     | 1.565 | 0.003039  | Mus musculus 15 days embryo male testis cDNA, RIKEN full-length enriched library, clone:8030467K01 product:unknown EST, full insert sequence.                                |
| Npm1        | NM_008722    | 1.563 | 0.007538  | Nucleophosmin 1                                                                                                                                                              |
| Rps8        | NM_009098    | 1.56  | 0.005469  | Ribosomal protein S8                                                                                                                                                         |
| BC028819    | NM_027434    | 1.559 | 0.0008046 | Mus musculus RIKEN cDNA 2610304G08 gene (2610304G08Rik), mRNA                                                                                                                |
| 9630005O07  | NM_027434    | 1.557 | 0.008289  | Mus musculus RIKEN cDNA 2610304G08 gene (2610304G08Rik), mRNA                                                                                                                |
| Chek2       | NM_016681    | 1.556 | 0.0003032 | CHK2 checkpoint homolog (S. pombe)                                                                                                                                           |
| Fgfbp1      | NM_008009    | 1.549 | 0.00832   | Fibroblast growth factor binding protein 1                                                                                                                                   |
| AK028246    | AK083328     | 1.544 | 0.00695   | Mus musculus 2 days neonate thymus thymic cells cDNA, RIKEN full-length enriched library, clone:C920006H21 product:lymphoid enhancer binding factor 1, full insert sequence. |
| Mapk8ip     | NM_011162    | 1.539 | 0.0004169 | Mitogen activated protein kinase 8 interacting protein 1                                                                                                                     |
| Slc4a7      | NM_001033270 | 1.537 | 0.008179  | Solute carrier family 4, sodium bicarbonate cotransporter, member 7                                                                                                          |
| Rnf170      | BC031383     | 1.534 | 0.004246  | Ring finger protein 170                                                                                                                                                      |
| Inhba       | NM_008380    | 1.528 | 0.006191  | Inhibin beta-A                                                                                                                                                               |
| Dvl2        | NM_007888    | 1.528 | 0.004836  | Dishevelled 2, dsh homolog (Drosophila)                                                                                                                                      |
| Ninj1       | NM_013610    | 1.526 | 0.0008588 | Ninjurin 1                                                                                                                                                                   |
| 2010011I20  | NM_025912    | 1.525 | 0.0008074 | Mus musculus RIKEN cDNA 2010011I20 gene (2010011I20Rik), mRNA                                                                                                                |
| Rpl23a      | NM_207523    | 1.524 | 0.002186  | Ribosomal protein L23a                                                                                                                                                       |
| B230315E17  | NM_175521    | 1.523 | 0.004421  | Mus musculus RIKEN cDNA 6430598A04 gene (6430598A04Rik), mRNA                                                                                                                |
| Plec1       | NM_201385    | 1.52  | 0.008263  | Plectin 1, transcript variant 2                                                                                                                                              |
| Gtf2h3      | NM_181410    | 1.512 | 0.006472  | General transcription factor IIIH, polypeptide 3                                                                                                                             |
| Khsrp       | NM_010613    | 1.51  | 0.004319  | KH-type splicing regulatory protein                                                                                                                                          |
| Bckdhb      | NM_199195    | 1.509 | 0.008237  | Branched chain ketoacid dehydrogenase E1, beta polypeptide                                                                                                                   |
| AK081297    | NM_145450    | 1.508 | 0.003972  | Mus musculus cDNA sequence BC022687 (BC022687), mRNA                                                                                                                         |
| Ran         | NM_009391    | 1.502 | 0.006732  | RAN, member RAS oncogene family                                                                                                                                              |

Down regulated genes, KTR (45' TNF $\alpha$ ) versus wild type (45' TNF $\alpha$ ),  $f_c < 0.667$ ,  $p \leq 0.01$

| Gene symbol   | Genbank      | Fc     | P value   | Gene name                                                                                                                                      |
|---------------|--------------|--------|-----------|------------------------------------------------------------------------------------------------------------------------------------------------|
| NAP000805-003 | XM_620550    | 0.0883 | 0.005954  | PREDICTED: Mus musculus hypothetical protein A630026L20 (A630026L20), mRNA                                                                     |
| Cnn1          | NM_009922    | 0.0978 | 0.0006639 | Calponin 1                                                                                                                                     |
| AK007972      | XM_283793    | 0.1116 | 0.00195   | PREDICTED: Mus musculus similar to Myl9 protein (LOC433496), mRNA                                                                              |
| NAP062850-1   | XM_485982    | 0.1313 | 0.001848  | PREDICTED: Mus musculus similar to very large inducible GTPase-1 (LOC434222), mRNA                                                             |
| Gvin1         | NM_029000    | 0.197  | 0.001289  | GTPase, very large interferon inducible 1                                                                                                      |
| NAP062850-1   | XM_485982    | 0.1988 | 0.00523   | PREDICTED: Mus musculus similar to very large inducible GTPase-1 (LOC434222), mRNA                                                             |
| AK019479      | AK019479     | 0.2022 | 0.006168  | Mus musculus 0 day neonate skin cDNA, RIKEN full-length enriched library, clone:4632401N01 product:hypothetical protein, full insert sequence. |
| Gvin1         | NM_029000    | 0.2202 | 5.71E-05  | GTPase, very large interferon inducible 1                                                                                                      |
| Usp18         | NM_011909    | 0.2279 | 0.00384   | Ubiquitin specific protease 18                                                                                                                 |
| Fhl1          | NM_010211    | 0.2299 | 0.0008483 | Four and a half LIM domains 1                                                                                                                  |
| Oas1f         | NM_145153    | 0.2827 | 0.008892  | 2'-5' oligoadenylate synthetase 1F                                                                                                             |
| Acta2         | NM_007392    | 0.284  | 0.006883  | Actin, alpha 2, smooth muscle, aorta                                                                                                           |
| Thy1          | NM_009382    | 0.2847 | 0.00291   | Thymus cell antigen 1, theta                                                                                                                   |
| Tagln         | NM_011526    | 0.2957 | 0.006663  | Transgelin                                                                                                                                     |
| Sulf1         | NM_172294    | 0.3022 | 0.003612  | Sulfatase 1                                                                                                                                    |
| Rtp4          | NM_023386    | 0.3049 | 0.0009136 | receptor transporter protein 4                                                                                                                 |
| H2-DMb1       | NM_010387    | 0.3093 | 0.0001682 | Histocompatibility 2, class II, locus Mb1                                                                                                      |
| Slit3         | XM_203363    | 0.3147 | 0.001266  | PREDICTED: Mus musculus slit homolog 3 (Drosophila), mRNA                                                                                      |
| Klf8          | NM_173780    | 0.318  | 7.52E-05  | Kruppel-like factor 8                                                                                                                          |
| Plac8         | NM_139198    | 0.3186 | 0.002931  | Placenta-specific 8                                                                                                                            |
| Trim30        | NM_009099    | 0.3202 | 0.003293  | Tripartite motif protein 30                                                                                                                    |
| Gvin1         | NM_029000    | 0.3341 | 0.009697  | GTPase, very large interferon inducible 1                                                                                                      |
| Tagln         | NM_011526    | 0.3401 | 0.008697  | Transgelin                                                                                                                                     |
| Oas1a         | NM_145211    | 0.3428 | 0.002358  | 2'-5' oligoadenylate synthetase 1A                                                                                                             |
| G1p2          | NM_015783    | 0.3456 | 0.0007558 | Interferon, alpha-inducible protein                                                                                                            |
| Itgbl1        | NM_145467    | 0.3501 | 0.002102  | Integrin, beta-like 1                                                                                                                          |
| C730018G06    | AK050122     | 0.364  | 0.007909  | Mus musculus adult male liver tumor cDNA, RIKEN full-length enriched library, clone:C730018G06 product:unknown EST, full insert sequence.      |
| Robo2         | NM_175549    | 0.3695 | 0.008165  | Roundabout homolog 2 (Drosophila)                                                                                                              |
| Ifit1         | NM_008331    | 0.3745 | 0.008209  | Interferon-induced protein with tetratricopeptide repeats 1                                                                                    |
| Pde8b         | NM_172263    | 0.382  | 0.003771  | Phosphodiesterase 8B                                                                                                                           |
| Bst2          | NM_198095    | 0.3824 | 0.009638  | Bone marrow stromal cell antigen 2                                                                                                             |
| Gbp3          | NM_018734    | 0.4039 | 0.003638  | Guanylate nucleotide binding protein 3                                                                                                         |
| Sfrp1         | NM_013834    | 0.4098 | 0.0002753 | Secreted frizzled-related sequence protein 1                                                                                                   |
| Cbfa2t1h      | NM_009822    | 0.4266 | 0.006621  | CBFA2T1 identified gene homolog (human)                                                                                                        |
| Phf11         | NM_172603    | 0.4507 | 0.008324  | PHD finger protein 11                                                                                                                          |
| Hen3          | NM_008227    | 0.4539 | 0.002285  | Hyperpolarization-activated, cyclic nucleotide-gated K+ 3                                                                                      |
| LOC56628      | NM_001001892 | 0.4544 | 0.002074  | histocompatibility 2, K1, K region (H2-K1), transcript variant 1                                                                               |
| Pde1a         | NM_016744    | 0.466  | 0.009398  | Phosphodiesterase 1A, calmodulin-dependent                                                                                                     |
| Kcnab1        | NM_010597    | 0.4741 | 0.006635  | Potassium voltage-gated channel, shaker-related subfamily, beta member 1                                                                       |
| 3110052M02    | XM_484601    | 0.4819 | 0.007615  | PREDICTED: Mus musculus RIKEN cDNA 3110052M02 gene (3110052M02Rik), mRNA                                                                       |
| 1700006C13    | XM_489178    | 0.4855 | 0.00224   | PREDICTED: Mus musculus RIKEN cDNA 6620401M08 gene (6620401M08Rik), mRNA                                                                       |
| H2-K1         | BC080756     | 0.4939 | 0.003382  | Histocompatibility 2, K1, K region                                                                                                             |

| Gene symbol | Genbank      | Fc     | P value   | Gene name                                                                                                                                                                      |
|-------------|--------------|--------|-----------|--------------------------------------------------------------------------------------------------------------------------------------------------------------------------------|
| Zfp286      | NM_138949    | 0.4984 | 0.005993  | Zinc finger protein 286                                                                                                                                                        |
| Agm         | NM_021604    | 0.5201 | 0.009017  | Agurin                                                                                                                                                                         |
| NAP104453-1 |              | 0.5213 | 0.005591  | Q7TP79 (Q7TP79) Aa2-245, partial (5%) [TC1434027]                                                                                                                              |
| Ctsc        | NM_009982    | 0.5315 | 0.00753   | Cathepsin C                                                                                                                                                                    |
| Ifit3       | NM_010501    | 0.5371 | 0.007416  | Interferon-induced protein with tetratricopeptide repeats 3                                                                                                                    |
| Ak5         | AK053807     | 0.5406 | 0.005011  | Mus musculus 0 day neonate eyeball cDNA, RIKEN full-length enriched library, clone:E130309L01 product:ADENYLATE KINASE ISOZYME 5 homolog [Mus musculus], full insert sequence. |
| 4632422O06  | AK122518     | 0.5424 | 0.003056  | Mus musculus mRNA for mKIAA1500 protein                                                                                                                                        |
| Akap12      | NM_031185    | 0.5521 | 0.005651  | A kinase (PRKA) anchor protein (gravin) 12                                                                                                                                     |
| Gli2        | NM_001081125 | 0.554  | 0.00503   | GLI-Kruppel family member GLI2                                                                                                                                                 |
| Cacna1c     | NM_009781    | 0.5554 | 0.002913  | Calcium channel, voltage-dependent, L type, alpha 1C subunit                                                                                                                   |
| Ccng1       | NM_009831    | 0.5584 | 1.20E-05  | Cyclin G1                                                                                                                                                                      |
| AK052172    | NM_198625    | 0.5586 | 0.008266  | Mus musculus cDNA sequence BC060632 (BC060632), mRNA                                                                                                                           |
| Gpr64       | NM_178712    | 0.5595 | 0.00589   | G protein-coupled receptor 64                                                                                                                                                  |
| 6330400M01  | AK122576     | 0.5595 | 0.008025  | Mus musculus mRNA for mKIAA3001 protein.                                                                                                                                       |
| AK053854    | AK053854     | 0.5656 | 0.006042  | Mus musculus 0 day neonate eyeball cDNA, RIKEN full-length enriched library, clone:E130314P20 product:unknown EST, full insert sequence.                                       |
| AK003718    | AK003718     | 0.5659 | 0.002682  | Mus musculus 18-day embryo whole body cDNA, RIKEN full-length enriched library, clone:1110014O20 product:unknown EST, full insert sequence.                                    |
| C130051K14  | AK081614     | 0.5664 | 0.005707  | Mus musculus 16 days embryo head cDNA, RIKEN full-length enriched library, clone:C130051K14 product:unknown EST, full insert sequence.                                         |
| Cxcl16      | AK028875     | 0.5665 | 0.006037  | Mus musculus 10 days neonate skin cDNA, RIKEN full-length enriched library, clone:4732465K06 product:CXC chemokine ligand 16, full insert sequence.                            |
| Pmaip1      | NM_021451    | 0.5673 | 0.0008866 | Phorbol-12-myristate-13-acetate-induced protein 1                                                                                                                              |
| Foxo6       | NM_194060    | 0.5698 | 0.002442  | Forkhead box O6                                                                                                                                                                |
| Dgat2       | NM_026384    | 0.5704 | 0.000662  | Diacylglycerol O-acyltransferase 2                                                                                                                                             |
| Cyba        | NM_007806    | 0.5732 | 0.001416  | Cytochrome b-245, alpha polypeptide                                                                                                                                            |
| Smpd3       | NM_021491    | 0.575  | 0.0003079 | Sphingomyelin phosphodiesterase 3, neutral                                                                                                                                     |
| Sash1       | NM_175155    | 0.5759 | 0.005386  | SAM and SH3 domain containing 1                                                                                                                                                |
| D14Erd171e  | NM_177814    | 0.5789 | 0.007456  | Mus musculus DNA segment, Chr 14, ERATO Doi 171, expressed                                                                                                                     |
| Dock4       | NM_172803    | 0.5792 | 1.90E-06  | Dedicator of cytokinesis 4                                                                                                                                                     |
| AK028562    | AK028562     | 0.589  | 0.006826  | Mus musculus 10 days neonate skin cDNA, RIKEN full-length enriched library, clone:4731420E14 product:unknown EST, full insert sequence.                                        |
| Olf996      | NM_146437    | 0.5906 | 0.006491  | Olfactory receptor 996                                                                                                                                                         |
| 9330160D12  | NM_175003    | 0.5907 | 0.0052    | Mus musculus expressed sequence AU040829 (AU040829), mRNA                                                                                                                      |
| Itp1        | NM_010585    | 0.5947 | 0.008033  | Inositol 1,4,5-triphosphate receptor 1                                                                                                                                         |
| AK031716    | AK122518     | 0.597  | 0.002175  | Mus musculus mRNA for mKIAA1500 protein                                                                                                                                        |
| Gng12       | NM_025278    | 0.601  | 0.001838  | Guanine nucleotide binding protein (G protein), gamma 12                                                                                                                       |
| Pcdhb16     | NM_053141    | 0.6018 | 0.007695  | Protocadherin beta 16                                                                                                                                                          |
| Gbp2        | NM_010260    | 0.6026 | 0.008598  | Guanylate nucleotide binding protein 2                                                                                                                                         |
| Nudcd2      | NM_026023    | 0.603  | 0.001034  | NudC domain containing 2                                                                                                                                                       |
| TC1032971   |              | 0.604  | 0.00866   |                                                                                                                                                                                |
| Eif5a2      | NM_177586    | 0.6057 | 0.0067    | Eukaryotic translation initiation factor 5A2                                                                                                                                   |
| Ulk2        | NM_013881    | 0.611  | 6.22E-05  | Unc-51 like kinase 2 (C. elegans)                                                                                                                                              |
| Dnajc14     | NM_028873    | 0.6116 | 0.0004883 | DnaJ (Hsp40) homolog, subfamily C, member 14                                                                                                                                   |
| C130073O12  | AK081751     | 0.6142 | 0.005199  | Mus musculus 16 days embryo head cDNA, RIKEN full-length enriched library, clone:C130073O12 product:hypothetical protein, full insert sequence.                                |
| Prkcm       | NM_008858    | 0.6182 | 0.004474  | Protein kinase C, mu                                                                                                                                                           |

| Gene symbol   | Genbank   | Fc     | P value   | Gene name                                                                                                                                                                                     |
|---------------|-----------|--------|-----------|-----------------------------------------------------------------------------------------------------------------------------------------------------------------------------------------------|
| Tnfrsf21      | NM_178589 | 0.6214 | 0.008793  | Tumor necrosis factor receptor superfamily, member 21                                                                                                                                         |
| Ghr           | NM_010284 | 0.6237 | 0.002449  | Growth hormone receptor                                                                                                                                                                       |
| Smpd3         | NM_021491 | 0.6257 | 0.005263  | Sphingomyelin phosphodiesterase 3, neutral                                                                                                                                                    |
| Pcdhb3        | NM_053128 | 0.627  | 0.001204  | Protocadherin beta 3                                                                                                                                                                          |
| Gm1012        | NM_201367 | 0.6272 | 0.004042  | Gene model 1012, (NCBI) 67]                                                                                                                                                                   |
| AK009522      | AK009522  | 0.6276 | 0.002675  | Mus musculus adult male tongue cDNA, RIKEN full-length enriched library, clone:2310028H24 product:hypothetical Prenyl group binding site (CAAX box) containing protein, full insert sequence. |
| F3            | NM_010171 | 0.6293 | 0.007018  | Coagulation factor III                                                                                                                                                                        |
| NAP040287-1   |           | 0.6304 | 0.004413  |                                                                                                                                                                                               |
| BC058349      | BC058349  | 0.6314 | 0.002694  | Proline-rich transmembrane protein 3                                                                                                                                                          |
| 1110033B07    | AK027953  | 0.632  | 0.00537   | Mus musculus 18-day embryo whole body cDNA, RIKEN full-length enriched library, clone:1110033B07 product:hypothetical protein, full insert sequence.                                          |
| 5830464M07    | AK030937  | 0.6336 | 0.00406   | Mus musculus adult male thymus cDNA, RIKEN full-length enriched library, clone:5830464M07 product:unknown EST, full insert sequence.                                                          |
| Dgat2         | NM_026384 | 0.635  | 0.005261  | Diacylglycerol O-acyltransferase 2                                                                                                                                                            |
| Ebf2          | NM_010095 | 0.6352 | 0.004953  | Early B-cell factor 2                                                                                                                                                                         |
| AK077046      | AK077045  | 0.6361 | 0.008038  | Mus musculus adult male testis cDNA, RIKEN full-length enriched library, clone:4932437H03 product:similar to CENTROSONAL P4.1-ASSOCIATED PROTEIN [Homo sapiens], full insert sequence         |
| Olfm3         | NM_153157 | 0.6363 | 0.0004698 | Olfactomedin 3, transcript variant B                                                                                                                                                          |
| Nexn          | NM_199465 | 0.6403 | 0.005384  | Nexilin                                                                                                                                                                                       |
| AK033039      | AK033039  | 0.6437 | 0.004575  | Mus musculus adult male eyeball cDNA, RIKEN full-length enriched library, clone:7530403E16 product:unknown EST, full insert sequence.                                                         |
| Lama2         | NM_008481 | 0.6457 | 0.007093  | Laminin, alpha 2                                                                                                                                                                              |
| Creb3l2       | NM_178661 | 0.647  | 0.008575  | cAMP responsive element binding protein 3-like 2                                                                                                                                              |
| Has2          | AK045020  | 0.6474 | 0.008742  | Mus musculus 9.5 days embryo parthenogenote cDNA, RIKEN full-length enriched library, clone:B130019P18 product:hyaluronan synthase 2, full insert sequence.                                   |
| Elavl2        | NM_207685 | 0.6485 | 0.0091    | ELAV (embryonic lethal, abnormal vision, Drosophila)-like 2 (Hu antigen B),transcript variant 1                                                                                               |
| Ctdsp2        | NM_146012 | 0.6501 | 0.004998  | CTD (carboxy-terminal domain, RNA polymerase II, polypeptide A) small phosphatase 2                                                                                                           |
| Rhbdl6        | NM_172572 | 0.6503 | 0.006458  | Rhomboid, veinlet-like 6 (Drosophila)                                                                                                                                                         |
| 1700121C10    | AK007220  | 0.6526 | 0.005313  | Mus musculus adult male testis cDNA, RIKEN full-length enriched library, clone:1700121C10 product:unclassifiable, full insert sequence.                                                       |
| Bid           | NM_007544 | 0.6527 | 0.005866  | BH3 interacting domain death agonist                                                                                                                                                          |
| AK087334      | NM_177700 | 0.6548 | 0.006115  | Mus musculus cDNA sequence BC060631 (BC060631), mRNA                                                                                                                                          |
| Hsd3b2        | NM_153193 | 0.6556 | 0.003237  | Hydroxysteroid dehydrogenase-2, delta<sup>5</sup>-3-beta                                                                                                                                      |
| Alkbh5        | NM_172943 | 0.6564 | 0.004673  | AlkB, alkylation repair homolog 5 (E. coli)                                                                                                                                                   |
| C920008N22    | AK083336  | 0.6592 | 0.003428  | Mus musculus 2 days neonate thymus thymic cells cDNA, RIKEN full-length enriched library, clone:C920008N22 product:unknown EST, full insert sequence.                                         |
| Npr3          | AK040677  | 0.6601 | 0.003733  | Mus musculus adult male aorta and vein cDNA, RIKEN full-length enriched library, clone:A530014A01 product:natriuretic peptide receptor 3, full insert sequence.                               |
| 9030607L17Rik | NM_027829 | 0.6602 | 0.0007392 | Mus musculus RIKEN cDNA 9030607L17 gene (9030607L17Rik), mRNA                                                                                                                                 |
| C330021A05Rik | NM_153082 | 0.6614 | 0.001722  | Mus musculus RIKEN cDNA C330021A05 gene (C330021A05Rik), mRNA                                                                                                                                 |
| Olfir353      | NM_146941 | 0.6638 | 0.0001171 | Olfactory receptor 353                                                                                                                                                                        |
